# Supplementary material for: Cyto-Genotoxic and Transcriptomic Alterations in Human Liver Cells by Tris (2-Ethylhexyl) Phosphate (TEHP): A Putative Hepatocarcinogen
Source: MDPI journal article supplement (doi:10.3390/ijms23073998), 2022-04-03
Supplement: s1 [file s1]

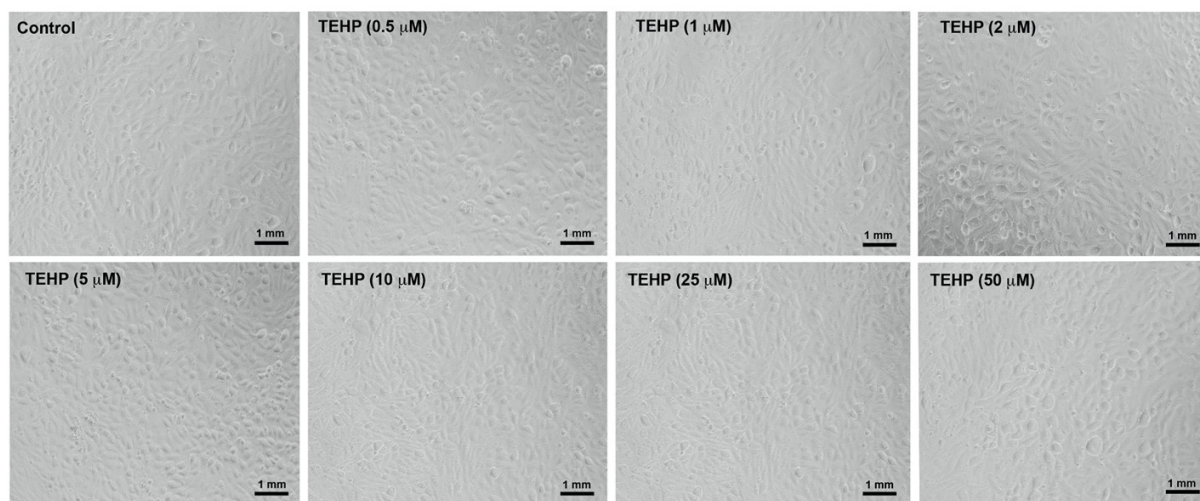

**Supplementary Figure S1.** Structural changes in HepG2 cells after 72h of exposure with at low concentrations of TEHP.

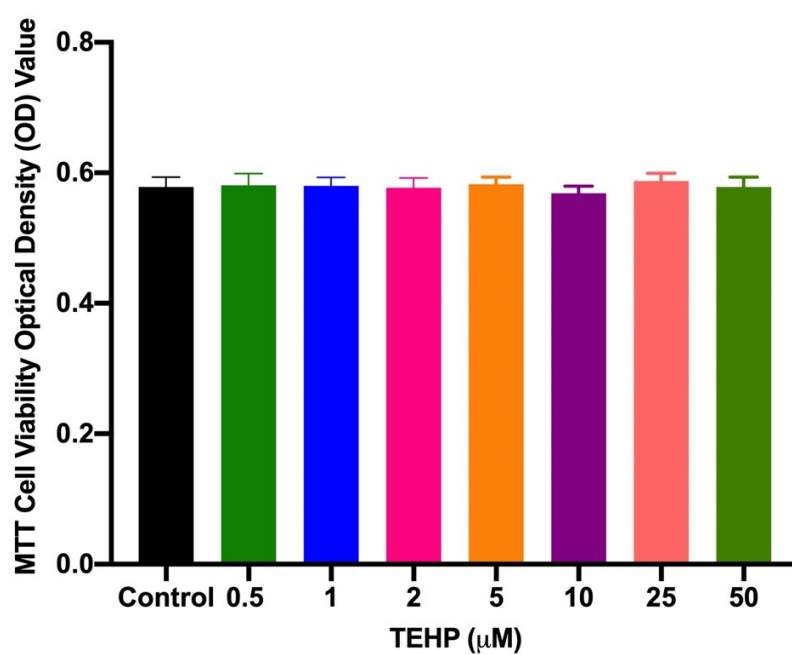

**Supplementary Figure S2.** Mitochondrial dehydrogenase-based cytotoxicity quantification in HepG2 cells after TEHP exposure for 72 h.

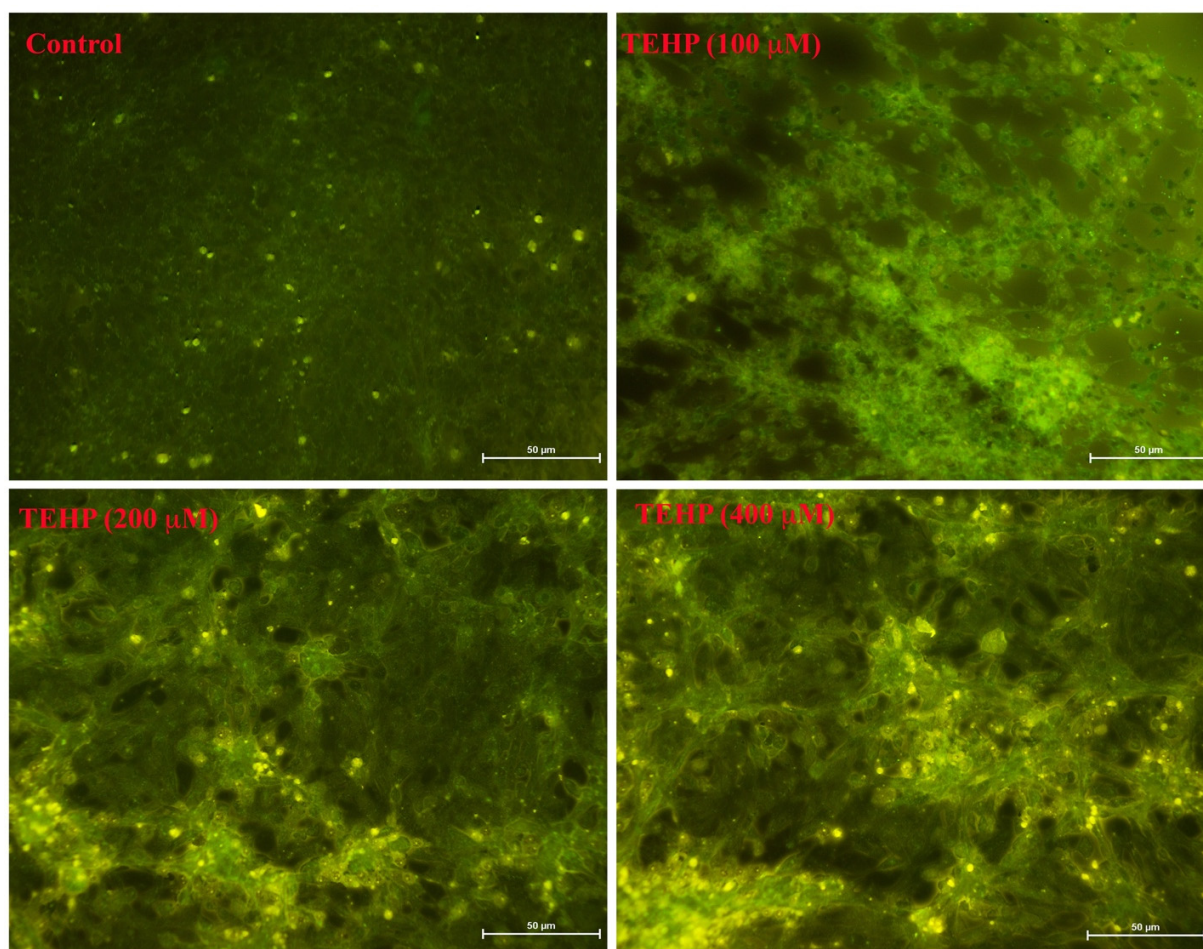

**Supplementary Figure S3.**  $\text{Ca}^{++}$  influx in HepG2 cells after TEHP (100-400  $\mu\text{M}$ ) treatment for 72h. Images were captured using a fluorescence microscope at 20X. Images depict an increase in the green fluorescence in TEHP treated cells stained with Fluo-3 (0.5  $\mu\text{M}$ ) for 1h. HepG2 cells were grown on 16-wells sterile cell-culture glass slide in a  $\text{CO}_2$  incubator (5%, 95% humidity, 37  $^{\circ}\text{C}$ ).
